# Supplementary material
Source: PubMed Central journal article supplement (PMC2519380)
Supplement: JB.00254-08_1.pdf [file JB.00254-08_1.pdf]

**Supplementary Figure 1.** Allelic glycosyltransferase Orf18. Alignment of the amino acid sequences of the Orf18 glycosyltransferases from the *C. jejuni* strains. Only variable residues are shown and "." indicates identical amino acid. The Orf18 from *C. jejuni* strain RM3441 HS:56 (Genbank accession number: EU410351) was also included in this analysis.

|                 |             |            |            |            |                |             |            |            |
|-----------------|-------------|------------|------------|------------|----------------|-------------|------------|------------|
|                 |             |            |            | 40         |                |             |            | 80         |
|                 |             |            |            |            |                |             |            |            |
| GB15f           | MPKISIIILPT | FNVEKYIAKA | LESCINQSFK | DIEIIVVDDC | GSDKSIDIAK     | EYAKKDERIK  | IIHNEKNLGT | FAARNNGVKH |
| RM1170f         | .....       | .....      | .....      | ..G..      | .....          | .....       | .....      | .....      |
| GB24k           | .....M..    | .....R..   | I..V..     | .....I..   | .....N..       | .....       | .....      | .....      |
| RM1221f/RM1508j | .....       | .....      | .....      | .....      | .....          | .....K..    | ..V..      | .....      |
| RM1850i         | .....       | .....      | .....      | .....      | .....          | .....       | .....E..   | .....      |
| RM2095n         | .....       | .....R..   | I..        | .....      | .....          | .....       | .....E..   | .....A     |
| RM2227/RM2229k  | .....M..    | .....R..   | I..V..     | .....I..   | .....N..       | .....       | .....      | .....      |
| RM3415f         | .....       | .....      | .....      | .....      | .....          | .....       | .....E..   | .....      |
| LIO87d/RM3418d  | .....       | .....      | .....      | .....      | .....          | .....       | .....V..   | .....      |
| RM3419s         | .....       | .....      | .....      | .....      | .....          | .....       | .....E..   | .....      |
| RM3437q         | .....I..    | Y.....     | R.....     | .....T..   | .....N..       | E.....      | .....T..   | KT.....    |
| RM3441?         | .....       | .....R..   | I..        | .....      | .....          | .....       | .....E..   | .....X     |
|                 |             |            |            | 120        |                |             |            | 160        |
|                 |             |            |            |            |                |             |            |            |
| GB15f           | SNSEYLMFLD  | PDDYLELDAC | EKLILLINTY | KICQFSFTQI | SNGIKLKSVF     | KDTLKNLKEF  | KGIYWNICTL | FVKKDFYLS  |
| RM1170f         | .....       | .....      | .....      | .....      | .....          | .....       | .....      | .....      |
| RM1221f/RM1508j | .....       | ..F..E..   | .....      | .....      | N.....         | .....       | .....      | .....      |
| RM1850i         | ..G.....    | ..F..E..   | .....      | .....      | N.....         | .....       | .....      | .....      |
| RM2095n         | AGGG..I...  | .....      | .....      | .....      | .....          | .....       | .....W..   | .....      |
| RM2227k/RM2229k | ..G.....    | .....      | .....H..   | .....      | ..V.....       | .....E..    | .....W..   | ..A....D.  |
| RM3415f         | ..G.....    | ..F..E..   | .....      | .....      | .....          | .....       | .....W..   | .....      |
| LIO87d/RM3418d  | ..G.....    | ..F..E..   | .....      | A.....     | N.....         | .....       | .....      | .....      |
| RM3419s         | ..G.....    | ..F..E..   | .....      | .....      | N.....         | .....       | .....      | .....      |
| RM3437q         | .....       | .....      | .....      | .....      | .....          | .....       | .....      | .....D.    |
| RM3441?         | AGGG..I...  | .....E..   | .....      | .....      | ..V.....       | ..F..E..    | .....      | .....W..   |
|                 |             |            |            | 200        |                |             |            | 240        |
|                 |             |            |            |            |                |             |            |            |
| GB15f           | LEELFLIDDK  | LLVAEDMLAV | FFLINNPKDD | EYLQVDLHLY | NYVDHSFSIT     | KRQRNKEKIQ  | ECLDDYFYIL | KYIKENKILK |
| RM1170f         | .....       | .....      | .....      | .....      | .....          | .....       | .....      | .....      |
| GB24k           | ..K..A...   | .....F..   | .....N..   | .....Y..   | .....N..       | .....R..... | D.....     | .....      |
| RM1221f/RM1508j | .....       | .....      | .....Y..   | .....      | .....          | .....R..... | F.....     | .....      |
| RM1850i         | .....       | .....      | .....      | .....      | .....N..       | .....       | .....      | .....      |
| RM2095n         | .....       | .....      | .....      | .....      | .....          | .....       | .....      | .....      |
| RM2227k/RM2229k | ..K..A...   | .....F..   | .....N..   | .....Y..   | .....N..       | .....R..... | D.....     | .....      |
| RM3415f         | .....       | .....      | .....      | .....      | .....          | .....R..... | .....      | .....      |
| LIO87d/RM3418d  | .....       | .....      | .....F..   | .....Y..   | .....N..       | .....       | .....      | .....      |
| RM3419s         | .....       | .....      | .....      | .....      | .....N..       | .....       | .....      | .....      |
| RM3437q         | ..K..A...   | .....F..   | .....N..   | .....Y..   | .....N..       | .....R..... | D.....     | .....      |
| RM3441?         | .....       | .....      | .....G..   | .....      | .....N..       | .....       | .....      | .....      |
|                 |             |            |            | 280        |                |             |            |            |
|                 |             |            |            |            |                |             |            |            |
| GB15-f          | ENLKSIVLIY  | LQIDILKFLF | NNKKINYFKY | KLLKKIYKCK | MLFLKLNFSK     | KFFYF---    | .....      | .....      |
| RM1170-f        | .....       | .....      | .....      | .....      | .....          | .....       | .....      | .....      |
| GB24-k          | .....A..    | .....      | .....E..   | .....M..   | I..LF.YHFLK--  | -----       | .....      | .....      |
| RM1221f/RM1508j | .....       | .....      | .....      | .....      | .....          | .....       | .....      | .....      |
| RM1850i         | .....       | .....      | .....      | .....M..   | I..LF.YHFF---  | -----       | .....      | .....      |
| RM2095n         | .....       | .....      | .....      | .....C..   | I..LF.YHFF---  | -----       | .....      | .....      |
| RM2227k/RM2229k | .....       | .....      | .....      | .....M..   | I..LF.YHFLK--  | -----       | .....      | .....      |
| RM3415f         | .....       | .....      | .....      | .....      | .....          | .....       | .....      | .....      |
| LIO87d/RM3418d  | .....       | .....      | .....      | .....CI..  | LN YF.TIFFKM.. | Q.YSIFL-    | .....      | .....      |
| RM3419s         | .....       | .....      | .....      | .....      | L.....         | .....       | .....      | .....      |
| RM3437q         | .....       | .....      | .....E..   | .....M..   | V..LI.A..F.KV  | -----       | .....      | .....      |
| RM3441?         | Q...L.A...  | .....      | .....E..   | .....      | .....          | .....       | .....      | .....      |
