# Supplementary material
Source: PubMed Central journal article supplement (PMC2519380)
Supplement: JB.00254-08_2.pdf [file JB.00254-08_2.pdf]

**Supplementary Figure 2.** Allelic glycosyltransferase Orf19. Alignment of the amino acid sequences of the Orf19 glycosyltransferases from the *C. jejuni* strains. Only variable residues are shown and "." indicates identical amino acid. The Orf19 from *C. jejuni* strain RM3441 HS:56 (Genbank accession number: EU410351) was also included in this analysis.

|                 |            |               |                   |                 |              |               |                     |                  |     |
|-----------------|------------|---------------|-------------------|-----------------|--------------|---------------|---------------------|------------------|-----|
|                 |            |               |                   | 38              |              |               |                     |                  | 78  |
|                 |            |               |                   |                 |              |               |                     |                  |     |
| RM3415f         | --MCKISVII | PIYNVEKYLD    | ECLKSVINQT        | YKDLDIILVD      | DGSTDNSLNI   | AKEYAKKDER    | IFLIAKGNNG          | LSSARNAGLE       |     |
| RM1861k/GB24k   | MNNPL..I.. | .....         | .....I.....       | .....           | .....        | .....         | ..IVV.E...          | .....            |     |
| RM2227k/RM2229k | MNNPL..I.. | .....         | .....I.....       | .....           | .....        | .....         | ..IVV.E...          | .....            |     |
| LIO87d/RM3418d  | --         | .....         | .....             | .....           | .....        | .....         | .....               | .....            |     |
| GB15f           | --         | .....         | .....             | .....           | .....        | .....         | .....               | .....            |     |
| RM1221f         | --         | .....         | .....             | .....           | .....        | .....         | .....               | .....            |     |
| RM1508j/RM1163j | --         | .....         | .....             | .....           | .....        | .....         | .....               | .....            |     |
| RM1850i/RM3419s | --         | .....         | .....K.....       | .....N.....     | .....I.....  | .....         | .....T.E...         | .....            |     |
| RM3437q         | --         | .....         | .....S.....       | .....K.....     | .....R.....  | .....         | .....T.E...         | .....            |     |
| RM3441?         | --         | .....         | .....I.....       | .....           | .....S.....  | .....         | .....               | .....            |     |
|                 |            |               |                   | 118             |              |               |                     |                  | 158 |
|                 |            |               |                   |                 |              |               |                     |                  |     |
| RM3415f         | FIKGTCLRDF | FENEENIISY    | KQSNTFKNST        | KELTKEEINK      | NFTKLSKNII   | QTKLKNLND     | IIQDLPDNI           | HFLSDDDYLE       |     |
| RM1861k/GB24k   | .....      | .....EK.....  | .....             | .....           | .....        | .....I.....   | .....A.....         | .....            |     |
| RM2227k/RM2229k | .....      | .....EK.....  | .....I.....       | .....           | .....        | .....I.....   | .....A.....         | .....            |     |
| LIO87d/RM3418d  | .....      | .....         | .....             | .....           | .....        | .....         | .....               | .....            |     |
| GB15f           | .....      | .....         | .....             | .....           | .....        | .....         | .....               | .....            |     |
| RM1221f         | .....      | .....         | .....             | .....           | .....        | .....         | .....               | .....            |     |
| RM1508j/RM1163j | .....      | .....         | .....             | .....           | .....        | .....         | .....               | .....            |     |
| RM1850i/RM3419s | .....      | .....         | .....             | .....           | .....        | .....         | .....               | .....            |     |
| RM3437q         | .....      | .....         | .....K.....N..... | .....K.....     | .....        | .....         | .....               | .....D           |     |
| RM3441?         | .....      | .....         | .....             | .....           | .....        | .....         | .....               | .....            |     |
|                 |            |               |                   | 198             |              |               |                     |                  | 238 |
|                 |            |               |                   |                 |              |               |                     |                  |     |
| RM3415f         | LDCIEKCVNE | MSKDDIDICT    | HNIKEFLEEE        | QVFRQKAECD      | IYLNCKYTKN   | ISGIDFFKKN    | NICEFYFAWQ          | GSFRAKLLNI       |     |
| RM1861k/GB24k   | .....      | .....N.....   | .....             | .....I.....     | .....        | .....         | .....               | .....A.....      |     |
| RM2227k/RM2229k | .....      | .....N.....   | .....             | .....I.....     | .....        | .....         | .....               | .....A.....      |     |
| LIO87d/RM3418d  | .....      | .....         | .....             | .....           | .....        | .....         | .....               | .....            |     |
| GB15f           | .....      | .....         | .....             | .....           | .....        | .....         | .....               | .....            |     |
| RM1221f         | .....      | .....         | .....             | .....           | .....        | .....         | .....               | .....            |     |
| RM1508j/RM1163j | .....      | .....         | .....             | .....           | .....        | .....         | .....               | .....            |     |
| RM1850i/RM3419s | .....      | .....         | .....             | .....           | .....        | .....         | .....               | .....A.....      |     |
| RM3437q         | .....      | .....         | .....             | .....           | .....A.....  | .....         | .....               | .....A...S...A   |     |
| RM3441?         | .....      | .....         | .....K.....       | .....           | .....        | .....G.....   | .....               | .....A...V...T   |     |
|                 |            |               |                   | 278             |              |               |                     |                  | 318 |
|                 |            |               |                   |                 |              |               |                     |                  |     |
| RM3415f         | YKLRFTYGIY | HEDHDFGTIL    | FLSAKKITCV        | KEELLIYRIR      | ANSIIKSEKE   | KIIPQSIPFY    | LEPLRYFDD           | YSKLRAYFKA       |     |
| RM1861k/GB24k   | .....      | .....         | .....             | .....           | .....        | .....N.....   | .....H.....         | .....            |     |
| RM2227k/RM2229k | .....      | .....         | .....             | .....           | .....        | .....N.....   | .....H.....         | .....            |     |
| LIO87d/RM3418d  | .....      | .....         | .....T.....       | .....           | .....        | .....         | .....               | .....            |     |
| GB15f           | .....      | .....         | .....             | .....           | .....        | .....         | .....               | .....            |     |
| RM1221f         | .....      | .....         | .....             | .....           | .....        | .....         | .....               | .....            |     |
| RM1508j/RM1163j | .....      | .....         | .....             | .....           | .....        | .....         | .....               | .....            |     |
| RM1850i/RM3419s | .....      | .....         | .....             | .....           | .....        | .....         | .....               | .....            |     |
| RM3437q         | .....      | .....         | .....             | .....I.....     | .....F.....  | .....KNM..... | .....H.....         | .....            |     |
| RM3441?         | .....      | .....         | .....             | .....           | .....        | .....         | .....               | .....            |     |
|                 |            |               |                   | 358             |              |               |                     |                  | 398 |
|                 |            |               |                   |                 |              |               |                     |                  |     |
| RM3415f         | YCMCVIGVNI | LLFCKESNIL    | DKKTPNKIFL        | HYIHYYLEQY      | YPLNYLNIND   | LFTLVGINLK    | LFRFKIMLRF          | YFRHPKKIFK       |     |
| RM1861k/GB24k   | .....      | .....S.....   | .....LQ.....      | .....           | .....K.....  | .....L.....   | .....F.S.L.....     | .....Q.LR.....   |     |
| RM2227k/RM2229k | .....      | .....S.....   | .....LQ.....      | .....           | .....K.....  | .....L.....   | .....F.S.L.....     | .....Q.LR.....   |     |
| LIO87d/RM3418d  | .....      | .....M.A..... | .....LQ.....      | .....           | .....K.....  | .....         | .....F.....         | .....            |     |
| GB15f           | .....      | .....         | .....             | .....           | .....        | .....         | .....F.....         | .....L.....      |     |
| RM1221f         | .....      | .....         | .....LQI.Y.....   | .....           | .....K.....  | .....         | .....F.....         | .....            |     |
| RM1508j/RM1163j | .....      | .....         | .....LQI.Y.....   | .....           | .....K.....  | .....         | .....F.....         | .....L.....      |     |
| RM1850i/RM3419s | .....      | .....M.A..... | .....LQ.....      | .....           | .....IK..... | .....         | .....F.....         | .....L.....      |     |
| RM3437q         | .....      | .....K.....   | .....R.....       | .....NE.LA..... | .....I.....  | .....K.....   | .....A.A...R.F..... | .....RLLF.L..... |     |
| RM3441?         | .....      | .....         | .....LQ.....      | .....           | .....K.....  | .....A.....   | .....F.....         | .....            |     |
|                 |            |               |                   | KNNA            |              |               |                     |                  |     |
| RM3415f         |            |               |                   | .K..            |              |               |                     |                  |     |
| RM1861k/GB24k   |            |               |                   | .K..            |              |               |                     |                  |     |
| RM2227k/RM2229k |            |               |                   | ....            |              |               |                     |                  |     |
| LIO87d/RM3418d  |            |               |                   | ....            |              |               |                     |                  |     |
| GB15f           |            |               |                   | ....            |              |               |                     |                  |     |
| RM1221f         |            |               |                   | ....            |              |               |                     |                  |     |
| RM1508j/RM1163j |            |               |                   | ....            |              |               |                     |                  |     |
| RM1850i/RM3419s |            |               |                   | ....            |              |               |                     |                  |     |
| RM3437q         |            |               |                   | ....            |              |               |                     |                  |     |
| RM3441?         |            |               |                   | ....            |              |               |                     |                  |     |
