# Supplementary material
Source: PubMed Central journal article supplement (PMC2519380)
Supplement: JB.00254-08_3.pdf [file JB.00254-08_3.pdf]

**Supplemental Table 1:** Assignment of the variants for the lipid A backbone of the deacylated LOS from *C. jejuni* GC175 using a basic structure containing Kdo<sub>2</sub>Hep<sub>2</sub>Hex<sub>2</sub>NeuAc<sub>1</sub>PEtn<sub>1</sub>.

| Strain | Lipid A variant               | Observed mass | Calculated mass |
|--------|-------------------------------|---------------|-----------------|
| GC175  | GlcN3N-GlcN- <i>PP</i> EtN    | 2865.8        | 2864.73         |
|        | GlcN3N-GlcN- <i>2PP</i> EtN   | 2989.5        | 2987.78         |
|        | GlcN3N-GlcN3N- <i>PP</i> EtN  | 3090.8        | 3090.11         |
|        | GlcN3N-GlcN3N- <i>2PP</i> EtN | 3214.3        | 3213.16         |
